# Supplementary material for: [15]aneN4S: Synthesis, Thermodynamic Studies and Potential Applications in Chelation Therapy
Source: MDPI journal article supplement (doi:10.3390/molecules19010550), 2014-01-03
Supplement: s2 [file s2]

### **Correction of Acknowledgments**

In the original published version of this paper we did not correctly and fully acknowledge our financial support. The acknowledgment is hereby additionally published as follows.

This work is financed by National funds through FCT – Fundação para a Ciência e Tecnologia under the project Ref. FCT PEst-OE/SAU/UI4013/2014.
